# Supplementary material for: Mixed-phase bismuth ferrite thin films by chemical solution deposition
Source: Royal Society of Chemistry journal article supplement (doi:10.1039/c7tc05841a), 2018-01-01
Supplement: c7tc05841a1.pdf [file c7tc05841a1.pdf]

## Supporting documents for

# Mixed-phase bismuth ferrite thin films by chemical solution deposition

Qi Zhang<sup>1</sup>, Hsin-Hui Huang<sup>1,2</sup>, Daniel Sando<sup>1</sup>, Max Summers<sup>1</sup>, Paul Munroe<sup>1</sup>, Owen Standard<sup>1</sup>,  
Nagarajan Valanoor<sup>1</sup>

<sup>1</sup> School of Materials Science and Engineering, University of New South Wales, Sydney, NSW 2052

<sup>2</sup> Graduate School of Engineering, Toyota Technological Institute, Nagoya, Japan, 468-8511

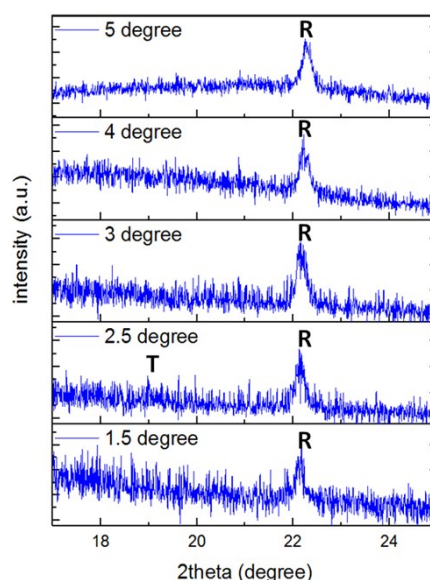

**Figure S1** Grazing angle XRD of BFO/LAO thin film

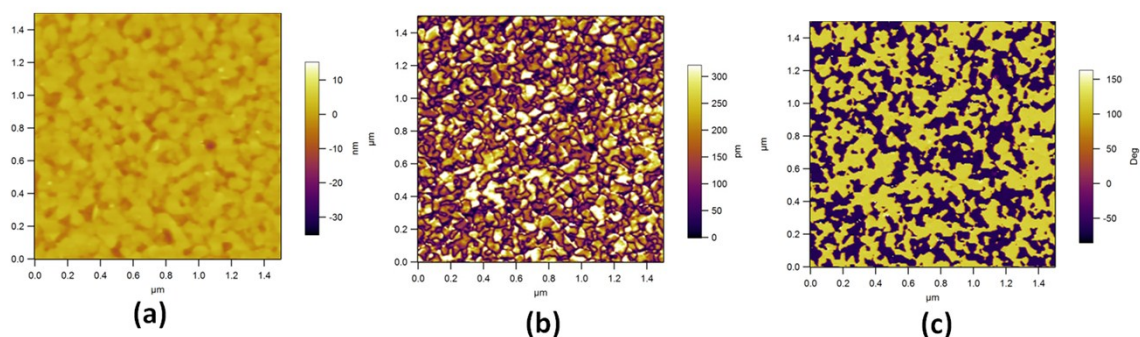

**Figure S2** (a) Topography; (b) PFM amplitude and (c) phase images (1.5 μm × 1.5 μm) of mixed phase BFO/LAO thin films

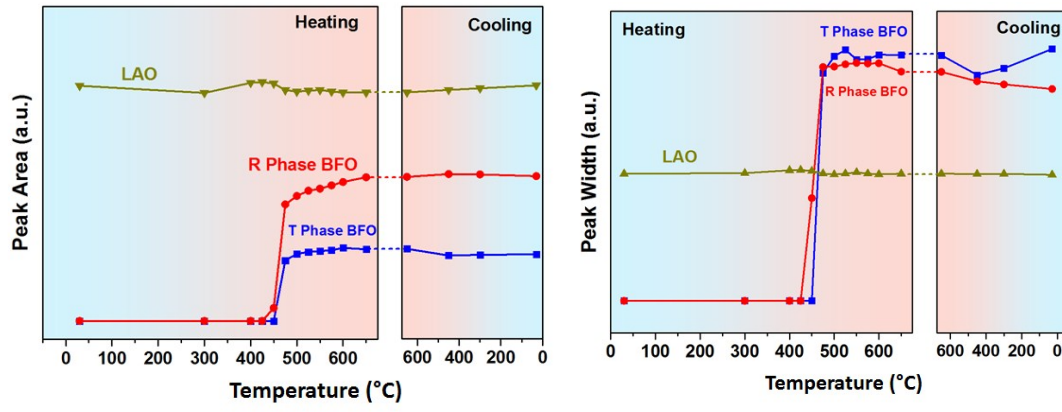

Figure S3. BFO T' and R' phase XRD peak area (a) and peak width (b) as function of heating and cooling temperature. XRD peaks from LAO substrate are used as reference.

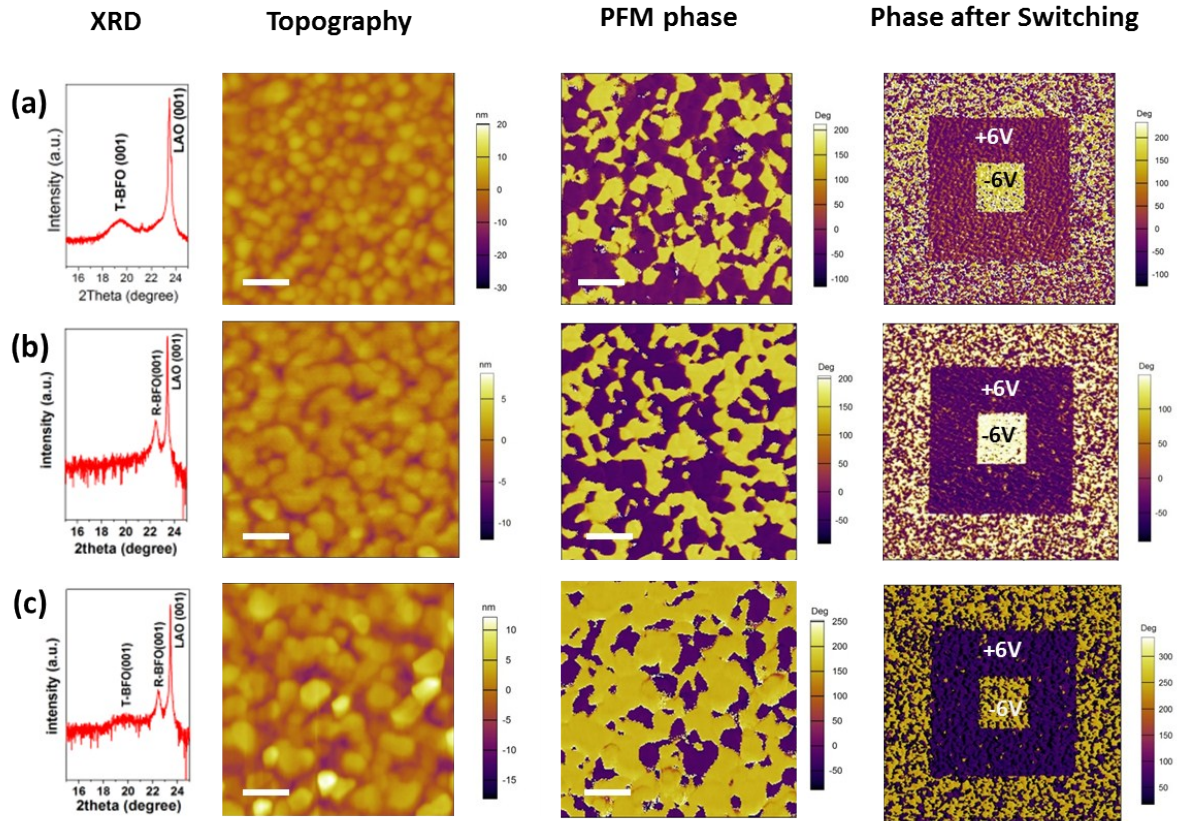

Figure S4 (a) BFO-T' phase; (b) BFO-R' phase; (c) BFO mixed-phase; 1<sup>st</sup> column: XRD pattern; 2<sup>nd</sup> column: topography (1 μm × 1 μm, Scale bar: 200 nm); 3<sup>rd</sup> column: as grown phase image(1 μm × 1 μm, Scale bar: 200 nm); 4<sup>th</sup> column: phase image(5 μm × 5 μm) after writing by ±6V; yellow phase- pole down, dark/purple phase-pole up.
